# Supplementary material for: Type-1 cytokines regulate matrix metalloprotease-9 production and E-cadherin disruption to promote melanocyte loss in vitiligo
Source: JCI journal article supplement (doi:10.1172/jci.insight.133772), 2020-05-05
Supplement: sd1 [file 1]

# **Type-1 cytokines regulate matrix metalloprotease-9 production and E-cadherin disruption to promote melanocyte loss in vitiligo**

Nesrine Boukhedouni<sup>1\*</sup>, Christina Martins<sup>1\*</sup>, Anne-Sophie Darrigade<sup>1,2</sup>, Claire Drullion<sup>1</sup>, Jérôme Rambert<sup>3</sup>, Christine Barrault<sup>4</sup>, Julien Garnier<sup>4</sup>, Clément Jacquemin<sup>1</sup>, Denis Thiolat<sup>1</sup>, Fabienne Lucchese<sup>1</sup>, Franck Morel<sup>5</sup>, Khaled Ezzedine<sup>6</sup>, Alain Taieb<sup>2</sup>, François-Xavier Bernard<sup>4</sup>, Julien Seneschal<sup>1,2,†</sup>, Katia Boniface<sup>1†</sup>

## **Affiliations:**

<sup>1</sup>INSERM U1035, BMGIC, Immuno-dermatology ATIP-AVENIR, University of Bordeaux, FHU ACRONIM

<sup>2</sup>Department of Dermatology and Pediatric Dermatology; National Reference Center for Rare Skin Disorders, Hôpital Saint-André, Bordeaux, France

<sup>3</sup>AQUIDERM, University of Bordeaux

<sup>4</sup>Bioalternatives SAS, Gençay, France

<sup>5</sup>Laboratoire Inflammation Tissus Epithéliaux et Cytokines EA 4331, University of Poitiers, Poitiers, France.

<sup>6</sup>Department of Dermatology, AP-HP, Hôpital Henri-Mondor, Créteil, France.

\*,<sup>†</sup> These authors contributed equally to this study.

## **Corresponding author:**

Katia Boniface  
INSERM U1035, BMGIC – Immunodermatology team  
University of Bordeaux  
146 rue Léo Saignat, Bâtiment TP zone sud, 4ème étage  
33076 Bordeaux Cedex  
Phone: +33 (0)5 57 57 13 73  
Email: [katia.boniface@u-bordeaux.fr](mailto:katia.boniface@u-bordeaux.fr)

**Supplemental Table 1. Distribution of individual features of 135 vitiligo patients depending on their spreading score**

| Feature                                                                    | Stable vitiligo (n=69) | Active vitiligo (n=66) | Total (N=135)        |
|----------------------------------------------------------------------------|------------------------|------------------------|----------------------|
| <b>Sex, No. (%)</b>                                                        |                        |                        |                      |
| Female                                                                     | 41(59.42)              | 45(68.18)              | 86(63.70)            |
| Male                                                                       | 28(40.58)              | 21(31.82)              | 49(36.29)            |
| <b>Age at inclusion (years)</b>                                            |                        |                        |                      |
| Mean ( $\pm$ SD)                                                           | 43.43( $\pm$ 12.98)    | 43.64( $\pm$ 14.32)    | 43.53( $\pm$ 13.65)  |
| Range                                                                      | 16-76                  | 14-80                  | 14-80                |
| <b>Age at vitiligo onset (years)</b>                                       |                        |                        |                      |
| Mean ( $\pm$ SD)                                                           | 28.76( $\pm$ 14.93)    | 29.28( $\pm$ 16.87)    | 29.02( $\pm$ 15.9)   |
| Range                                                                      | 3-57                   | 4-77                   | 3-77                 |
| <b>Disease duration (years)</b>                                            |                        |                        |                      |
| Mean ( $\pm$ SD)                                                           | 14.75( $\pm$ 12.65)    | 14.79( $\pm$ 11.93)    | 14.77 ( $\pm$ 12.29) |
| <b>Type of vitiligo, No. (%)</b>                                           |                        |                        |                      |
| Acrofacial                                                                 | 32(46.37)              | 3(4.54)                | 35(25.93)            |
| Generalized                                                                | 31(44.92)              | 47(71.21)              | 78(57.77)            |
| Universal                                                                  | 2(2.90)                | 3(4.54)                | 5(3.71)              |
| Mixed                                                                      | 3(4.35)                | 12(18.18)              | 15(11.11)            |
| Unknown                                                                    | 1(1.44)                | 1(1.51)                | 2(1.48)              |
| <b>Personal history of autoimmune or autoinflammatory disease, No. (%)</b> |                        |                        |                      |
| Yes, Autoimmune thyroiditis                                                | 6(8.69)                | 14(21.21)              | 20(14.81)            |
| Yes, Other chronic inflammatory diseases                                   | 8(11.59)               | 6(9.09)                | 14(10.37)            |
| Unknown                                                                    | 0                      | 2(3.03)                | 2(1.48)              |
| <b>Koebner phenomenon, No. (%)</b>                                         |                        |                        |                      |
| Yes, Any type                                                              | 45(65.21)              | 59(89.39)              | 104(77.04)           |
| Koebner phenomenon type 1                                                  | 8(11.59)               | 7(10.60)               | 15(11.11)            |
| Koebner phenomenon type 2a                                                 | 41(59.42)              | 59(89.39)              | 100(74.07)           |
| Koebner phenomenon type 2b                                                 | 11(15.94)              | 18(27.27)              | 29(21.48)            |
| No                                                                         | 24(34.78)              | 5(7.58)                | 29(21.48)            |
| Unknown                                                                    | 0                      | 2(3.03)                | 2(1.48)              |
| <b>Affected body surface area (BSA) (%), mean (<math>\pm</math>SD)</b>     |                        |                        |                      |
|                                                                            | 12( $\pm$ 17.72)       | 24.18( $\pm$ 16.82)    | 18.10( $\pm$ 17.27)  |
| <b>Spreading, mean (<math>\pm</math>SD)</b>                                |                        |                        |                      |
|                                                                            | 0.39( $\pm$ 0.49)      | 4.41( $\pm$ 0.80)      | 2.4 ( $\pm$ 0.65)    |
| <b>Spreading, No. (%)</b>                                                  |                        |                        |                      |
| 0                                                                          | 42(60.87)              | 0                      | 42(31.11)            |
| (+1)                                                                       | 27(39.13)              | 0                      | 27(20)               |
| (+3)                                                                       | 0                      | 13(19.69)              | 13(9.62))            |
| (+4)                                                                       | 0                      | 12(18.18)              | 12(8.88)             |
| (+5)                                                                       | 0                      | 41(62.12)              | 41(30.37)            |

**Supplemental Table 2. Distribution of individual features of 37 psoriasis patients**

| <b>Feature</b>                                   | <b>Psoriasis (n=37)</b> |
|--------------------------------------------------|-------------------------|
| <b>Sex, No. (%)</b>                              |                         |
| Female                                           | 15(40.54)               |
| Male                                             | 22(59.45)               |
| <b>Age at inclusion (years)</b>                  |                         |
| Mean ( $\pm$ SD)                                 | 49.62( $\pm$ 20.91)     |
| Range                                            | 19-94                   |
| <b>Age at v onset (years)</b>                    |                         |
| Mean ( $\pm$ SD)                                 | 34.11( $\pm$ 20.72)     |
| Range                                            | 5-83                    |
| <b>Disease duration (years)</b>                  |                         |
| Mean ( $\pm$ SD)                                 | 15.51( $\pm$ 17.80)     |
| <b>PASI score</b>                                |                         |
| Mean ( $\pm$ SD)                                 | 17.88( $\pm$ 13.63)     |
| <b>Body mass index (BMI) (kg/cm<sup>2</sup>)</b> |                         |
| Mean ( $\pm$ SD)                                 | 25.46( $\pm$ 5.15)      |

**A**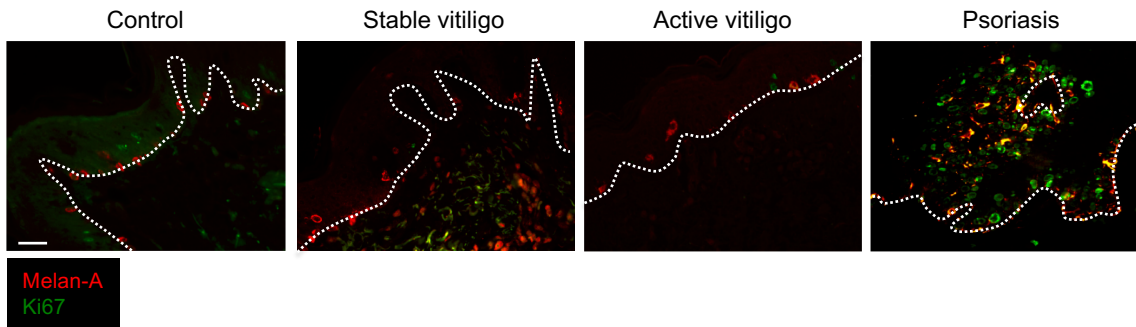**B**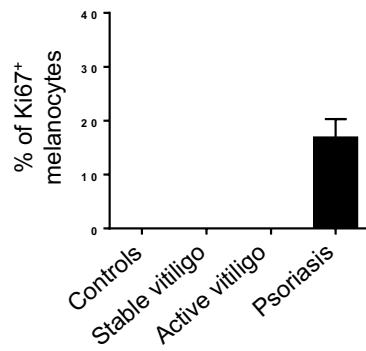

**Supplemental Figure 1. Melanocyte proliferation in vitiligo and psoriasis patients. (A)** Representative immunofluorescence analysis of Ki67 (green) and melan-A (red) staining in control healthy skin, stable or active vitiligo perilesional skin, and psoriasis lesional skin. Dashed lines represent the dermo-epidermal layer. Scale bar represents 40 $\mu$ m. **(B)** Proportion of Ki67<sup>+</sup> melanocytes in control healthy skin (n=3), stable (n=5) or active vitiligo perilesional skin (n=5) and psoriasis lesional skin (n=4). Data show mean + SEM.

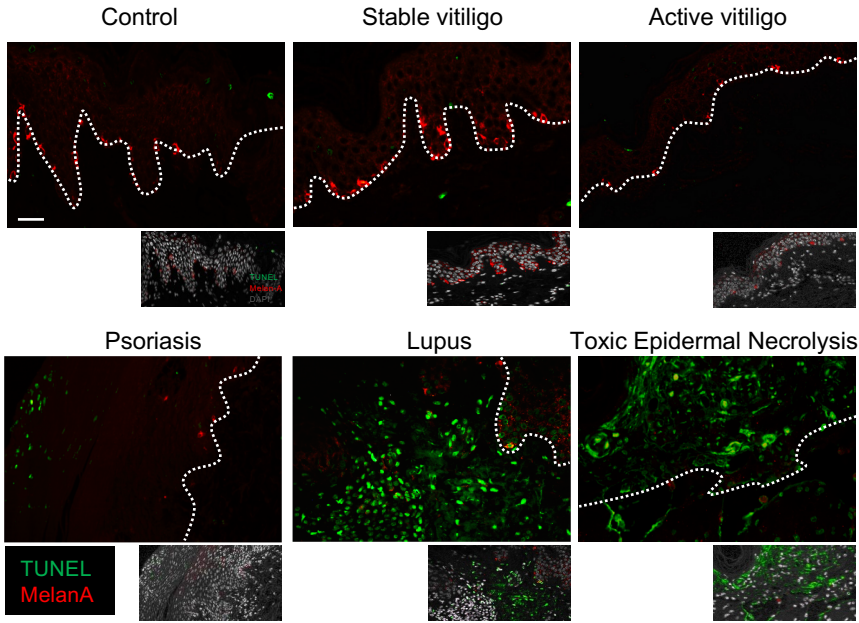

**Supplemental Figure 2. Analysis of melanocyte apoptosis in vitiligo and psoriasis skin.** Representative analysis of epidermal cell death using a TUNEL assay (green). Melanocytes were stained with anti-melan-A antibody (red), in control healthy skin, stable and active vitiligo perilesional skin, or lesional skin from psoriasis, cutaneous lupus erythematosus, and toxic epidermal necrolysis. Dashed lines represent dermo-epidermal layer. Scale bar represents 50 $\mu$ m. Data are representative of five independent experiments.

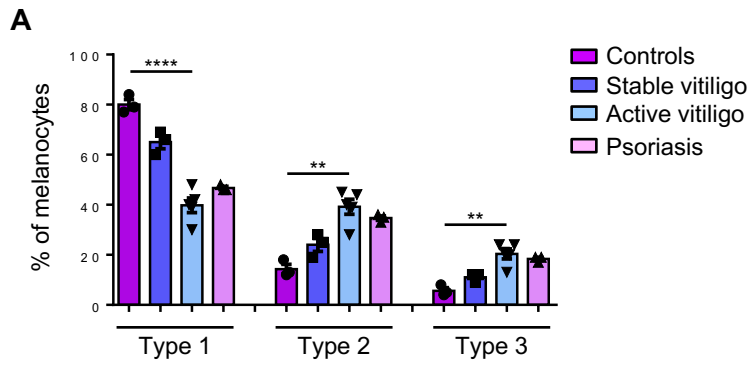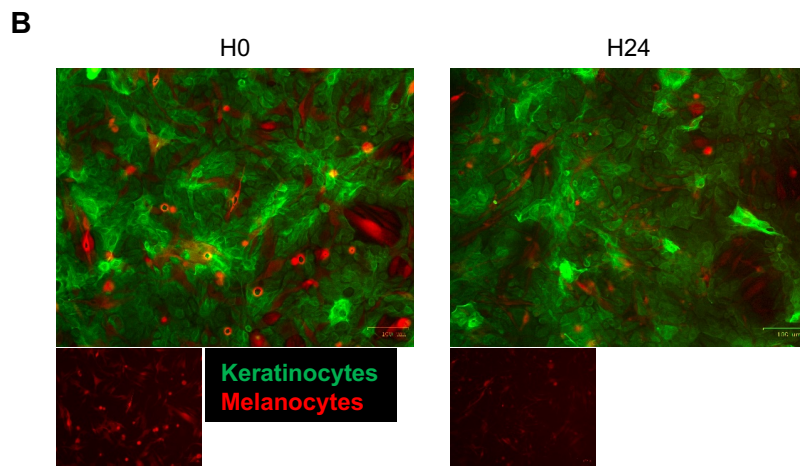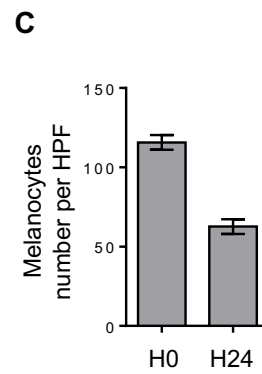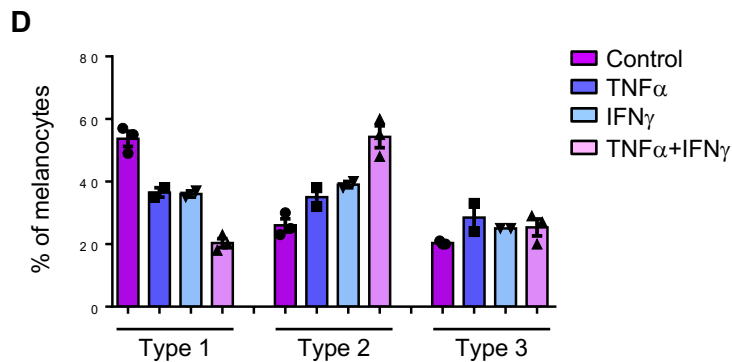

**Supplemental Figure 3. Adhesion defect of melanocytes in vitiligo patients skin and *in vitro* in response to TNF $\alpha$  and IFN $\gamma$ .** (A) Proportion of melanocytes displaying type 1, type 2, or type 3 E-cadherin labeling in healthy control skin (n=3), perilesional skin of patients with stable (n=3) or active (n=5) vitiligo or psoriasis lesional skin (n=3). (B-C) Impact of TNF $\alpha$  and IFN $\gamma$  on melanocyte adhesion in cocultures of primary human keratinocytes (green) and melanocytes (red). (B) Representative images before (H0) and after 24h of treatment with 10ng/ml of TNF $\alpha$  and IFN $\gamma$  (H24). (C) The number of melanocytes was evaluated before and after treatment. (D) Proportion of melanocytes displaying type 1, type 2, or type 3 labeling (n=3) in RHPE treated for 24h in the presence or absence of 10ng/ml of TNF $\alpha$  and/or IFN $\gamma$ . Type 1: Homogeneous E-cadherin staining; type 2: Heterogeneous E-cadherin staining; and type 3: Absence of E-cadherin staining. Data show mean  $\pm$  SEM. \* $P < 0.05$ , calculated with Kruskal-Wallis test.

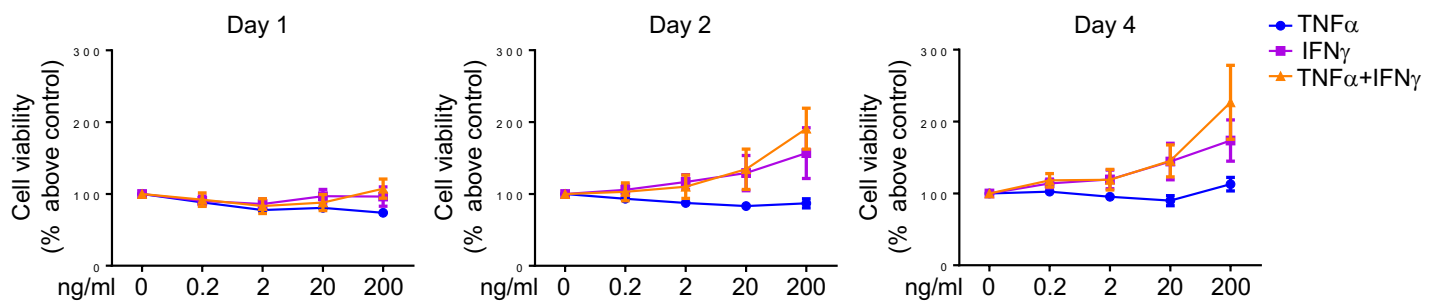

**Supplemental Figure 4. TNF $\alpha$  and IFN $\gamma$  impact on melanocyte viability.** NHEM viability was assessed in response to increasing concentrations of TNF $\alpha$  and/or IFN $\gamma$  for the indicated time. Results are shown as % of viable cells in comparison to the control culture. Data show mean  $\pm$  SEM of 6 independent experiments.

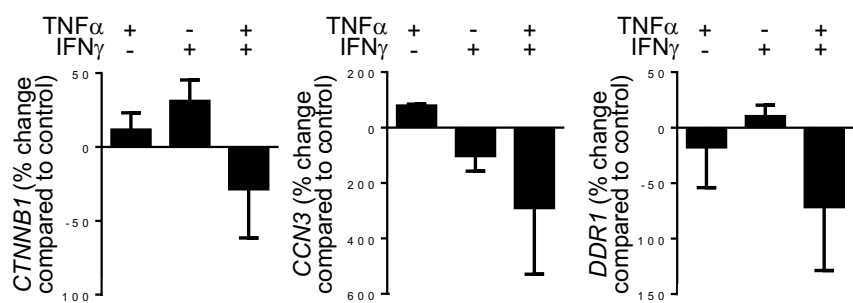

**Supplemental Figure 5. Biological activity of type-1 cytokines IFN $\gamma$  and TNF $\alpha$  on melanocyte adhesion.** Primary cultures of NHEM were stimulated in the presence or absence of 20ng/ml of IFN $\gamma$  and/or TNF $\alpha$ . *CTNNB1*, *CCN3*, and *DDR1* gene expression was analyzed by real-time PCR. Results are shown as the % of change compared to the control culture. *GAPDH* was used as housekeeping gene. Data show mean  $\pm$  SEM of 4 to 7 independent experiments.



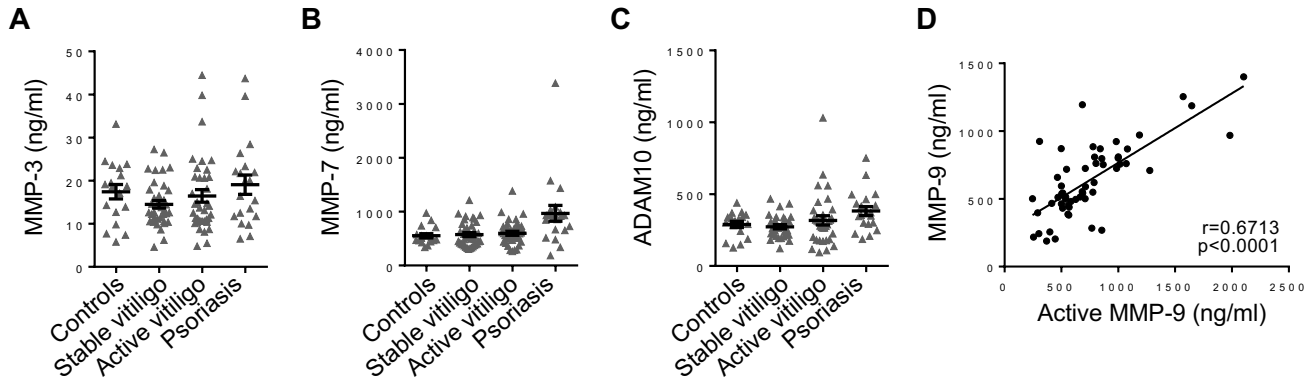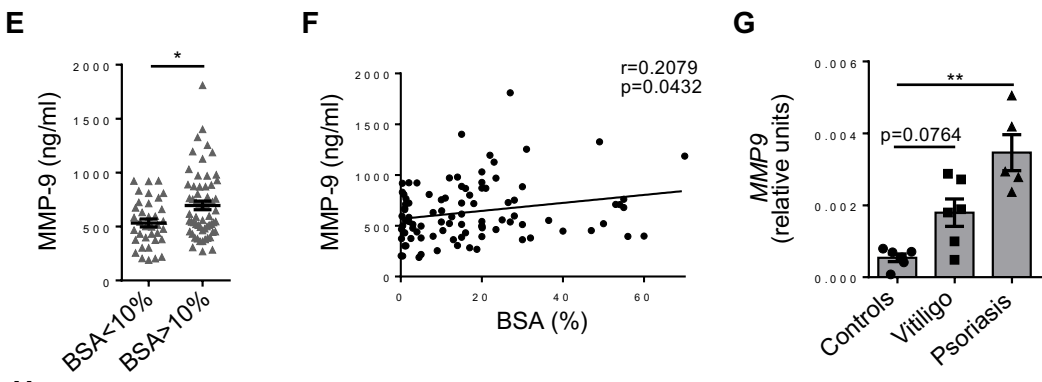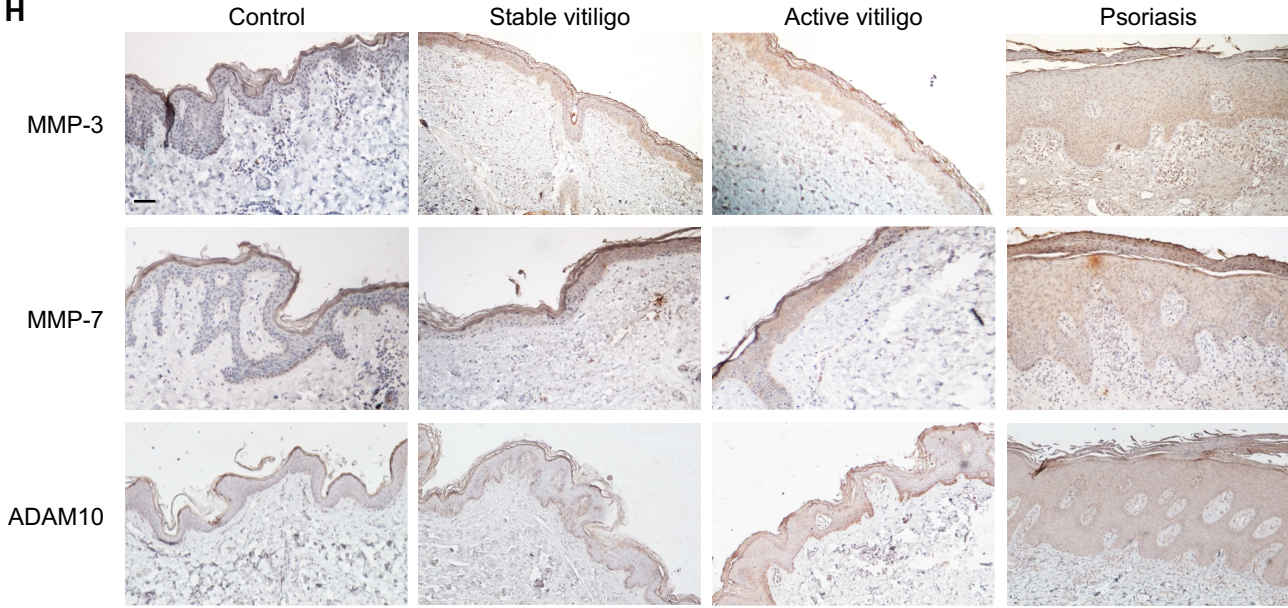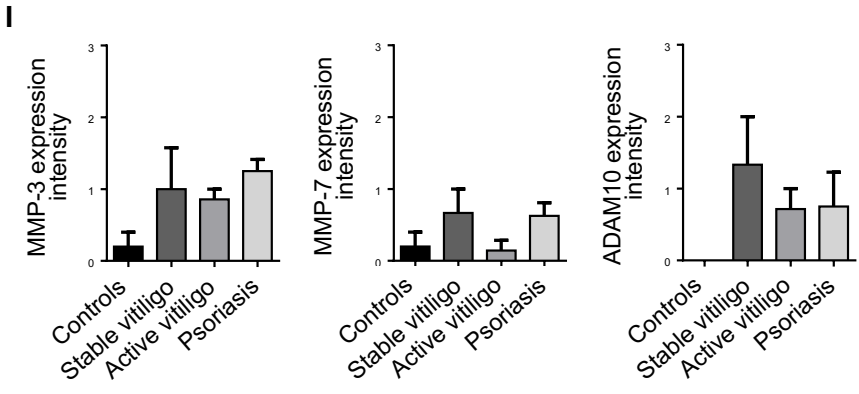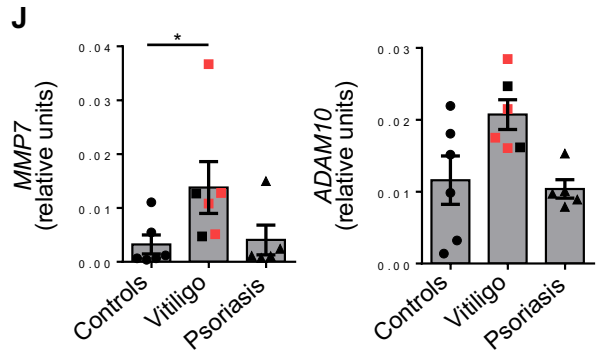

**Supplemental Figure 6. Expression of MMPs in blood and skin of vitiligo and psoriasis patients.** (A-C) Assessment by ELISA of levels of MMP-3 (A), MMP-7 (B), and ADAM10 (C) in sera of healthy controls (n=18), patients with stable (n=37) or active (n=37) vitiligo, or psoriasis (n=20). (D) Spearman's rho correlation (two-tailed) between serum total MMP-9 and active MMP-9 levels (n=56). (E) MMP-9 serum levels in vitiligo patients according to the BSA involved (BSA<10%, n=36, or BSA>10%, n=59). (F) Spearman's rho correlation (two-tailed) between serum total MMP-9 and BSA involved (n=95) in vitiligo patients. (G) Real-time PCR analysis of *MMP9* gene expression in control healthy skin (n=6), vitiligo perilesional skin (n=6), and lesional psoriasis skin (n=5). (H) Representative IHC staining of MMP-3 (top), MMP-7 (middle), and ADAM10 (bottom) in healthy skin, perilesional skin of stable and active vitiligo, and psoriasis lesional skin. Scale bar represents 100µm. (I) Semi-quantitative analysis of MMP-3, MMP-7, and ADAM10 expression in skin from healthy controls (n=3-5), perilesional skin of vitiligo patients with stable (n=2-3) or active (n=7) disease, and lesional psoriasis skin (n=4-8). (J) Real-time PCR analysis of *MMP3* and *ADAM10* gene expression in control healthy skin (n=6), vitiligo perilesional skin (n=6; black squares: stable vitiligo, red squares: active vitiligo), and psoriasis lesional skin (n=5). Data in A,B,C,E,G,I,J show mean ± SEM. \**P* < 0.05, \*\**P* < 0.01 ; calculated with Wilcoxon (E) or Kruskal-Wallis (G,J) tests.

**A****NHEK**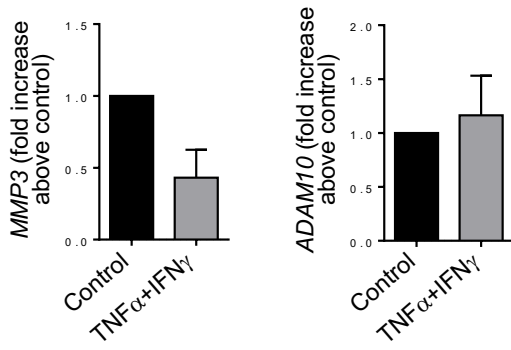**B****RHPE**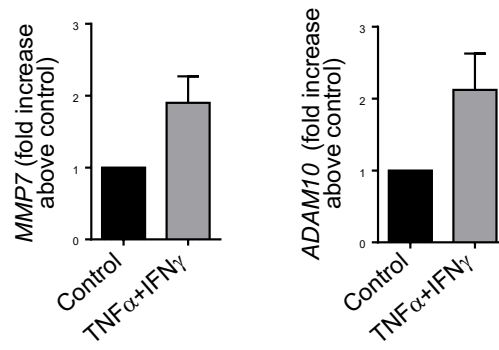

**Supplemental Figure 7. Expression of *MMP3*, *MMP7*, and *ADAM10* genes in NHEK and RHPE.** (A) NHEK and (B) RHPE were stimulated for 24h in the absence or presence of TNF $\alpha$  and IFN $\gamma$ . Real-time PCR analysis of *MMP3*, *ADAM10*, and *MMP7* gene expression. *GAPDH* was used as a housekeeping gene. Data are shown as fold increase above the control culture (mean + SEM of 7 (A) or 6 (B) independent experiments). *MMP3* and *MMP7* genes were below the detection limit in NHEK and RHPE respectively.

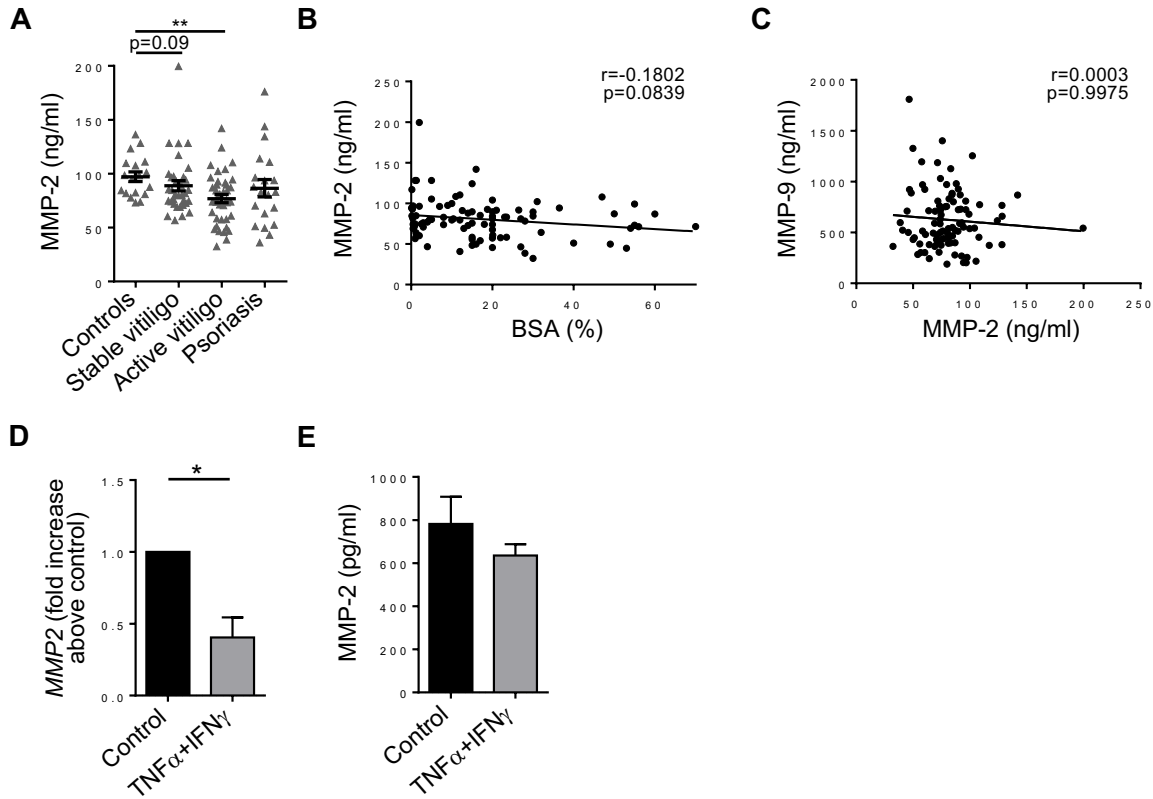

**Supplemental Figure 8. Expression of MMP-2 in vitiligo patients.** (A) Assessment by ELISA of MMP-2 levels in sera of healthy controls (n=18), patients with stable (n=34) or active (n=39) vitiligo, or psoriasis (n=20). (B-C) Spearman's rho correlation (two-tailed) between (B) MMP-2 serum levels and BSA involved and (C) MMP-2 and MMP-9 serum levels in vitiligo patients (n=94). (D-E) NHEK were stimulated for 24h in the absence or presence of 20 ng/ml of TNF $\alpha$  and IFN $\gamma$ . (D) Real-time PCR analysis of *MMP2* gene expression. *GAPDH* was used as housekeeping gene. Data are shown as fold increase above the control culture. (E) ELISA analysis of MMP-2 levels in cell-free culture supernatants. Data show mean + SEM of six independent experiments. \* $P < 0.05$ , \*\* $P < 0.01$ ; calculated with Kruskal-Wallis (A) or Wilcoxon (D) tests.

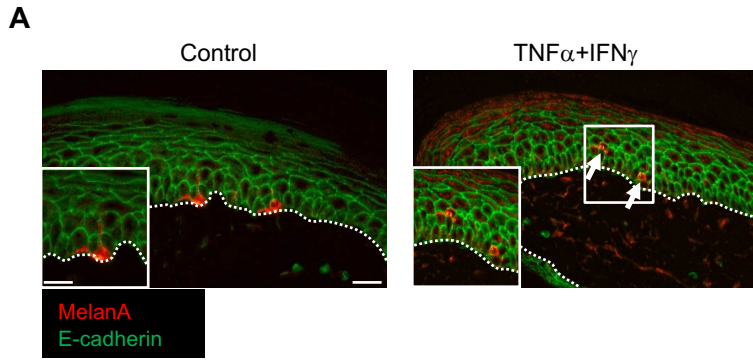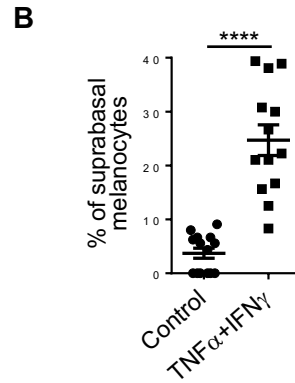

**Supplemental Figure 9. *In vivo* impact of  $TNF\alpha$  and  $IFN\gamma$  on melanocyte detachment.** C57BL/6 mouse tails were treated by intradermal injection of saline solution (control) or  $1\mu g$   $TNF\alpha$  and  $IFN\gamma$  according to the same protocol described in Figure 4F. **(A)** Representative immunofluorescence analysis of melan-A (red) and E-cadherin (green) staining in the different groups. Dashed lines represent the dermo-epidermal layer. Arrows show suprabasal melanocytes. Scale bars represent  $20\mu m$ . **(B)** Proportion of suprabasal melanocytes was assessed in the different groups ( $n=7-9$ ). Data shown mean  $\pm$  SEM \*\*\*\* $P < 0.0001$ , calculated with two-tailed Mann–Whitney test.
